# Supplementary material for: Self-assembly of hydrazide-linked porous organic polymers rich in titanium for efficient enrichment of glycopeptides and phosphopeptides from human serum
Source: Royal Society of Chemistry journal article supplement (doi:10.1039/d3an00709j), 2023-01-01
Supplement: d3an00709j1.pdf [file d3an00709j1.pdf]

## Supplementary information

### Pretreatment of the standard proteins and actual sample

$\beta$ -casein (1 mg) HRP (1 mg) and BSA (2 mg) were dissolved in 100  $\mu$ L of deionized water, respectively. After 5 minutes of ultrasonic mixing, the proteins were denatured in 100 °C boiling water for 15 minutes. After the denatured protein sample was cooled to room temperature, 100  $\mu$ L of ammonium bicarbonate (50 mM) was added together with the addition of trypsin at protein to trypsin quality ratio of 40 to 1.

The mixed solution was incubated for 16 hours at room temperature to allow complete protein digestion. The obtained solutions were collected in centrifuge tubes and saved at -20 °C for further use. Serum (2  $\mu$ L) was diluted in 16  $\mu$ L of  $\text{NH}_4\text{HCO}_3$  (50 mM) buffer and denatured in 100 °C boiling water for 15 min. The mixture was reduced by DTT at 37 °C for 1 h and alkylated by IAA at 37 °C for 1 h in the dark. Then the obtained mixture was incubated with trypsin (trypsin/protein is 1/40, w/w) at 37 °C for 16 h. Tryptic digests were lyophilized for further enrich and analyze.

### Characterization

Scanning electron microscopy (SEM, Keol 2012 microscope), Energy-dispersive X-ray spectroscopy (EDX, Keol 2012 microscope), Fourier transform infrared spectra (FT-IR, Thermo Fisher Scientific 10 infrared spectrometer analysis), XPS (Thermo Scientific K-Alpha).

### Mass spectrometry analysis and database search

For MALDI-TOF MS analysis. All the sample analyses were performed on a Matrix-assisted laser desorption ionization time-of-flight mass spectrometry (MALDI TOF MS) (Bruker, USA). Firstly, 1  $\mu$ L of eluent was spotted on the target plate and dried naturally. Next, 1  $\mu$ L of matrix solution was spotted on the sample target and dried naturally for MS analysis. MALDI-TOF MS

spectra were acquired in the positive ion mode with an Nd:Y AG laser (383 nm) at 20 kV of TOF accelerating voltage. The mass to charge ( $m/z$ ) range from 1000 to 5100 were recorded under the constant laser intensity. The results were analyzed by the FlexAnalysis software.

The experiments were conducted on an EASY-nLCTM 1200 system (Thermo Scientific, USA) coupled with an Orbitrap Fusion Lumos mass spectrometer (Thermo Finnigan, San Jose, CA) with nanoelectrospray ion source. Solvent A (water with 0.1% formic acid) and solvent B (ACN with 0.1% formic acid) were prepared. The deglycosylated peptides (10  $\mu$ L) were loaded by the autosampler into the trap column (Thermo Scientific, 100  $\mu$ m  $\times$  2 cm, 5  $\mu$ m, 100  $\text{\AA}$ , C18), with a flow of 8  $\mu$ L/min for 4 min and subsequently separated on the analytical column (Thermo Scientific, 75  $\mu$ m  $\times$  25 cm, 5  $\mu$ m, 100  $\text{\AA}$ , C18). The relevant liquid gradient was as follows: from 0 min to 40 min, the linear gradient was from 5% B to 28% B; from 40 min to 42 min, the linear gradient was from 28% B to 90% B, and from 42 min to 60 min, solvent B was kept at 90%. The flow rate was 300 nL/min, and the column temperature was maintained at 40  $^{\circ}$ C. The electrospray voltage was operated at 2.0 kV with the ion transfer capillary at 300  $^{\circ}$ C. The mass spectrometer was run in positive mode. Full-scan MS spectra ( $m/z$  350–1800) were acquired in the Orbitrap with a resolution of 120,000 at  $m/z$  200, scan mode set at top speed, the microscans were set at 1. The AGC target was set to  $4e^5$ , and the maximum injection time was 50 ms, the number of scan ranges set at 1, dynamic exclusion of 40.0 s, data-dependent mode set at cycle time, and the time between master scans set at 3 s. The mass-to-charge ratios of peptides and peptide fragments were gathered in line with the following strategy: the MS2 scan was performed at the same time as the master scan, the cycle time was 3 s. The intensity threshold was  $5e^4$  and the MS2 activation type was HCD, the MS2 resolution was 50,000 at  $m/z$  200. The microscans were set at 1, the maximum injection time was

105 ms, and the AGC target was set to  $1e^5$ . The isolation window was 1.6 m/z, the HCD collision energy was 35% and first mass was set at 110 m/z.

Database search and data analysis. The original data of mass spectrometry analysis was RAW file, and the built-in software Proteome Discoverer 2.4 (Thermo Scientific) was used for library identification and quantitative analysis. The uniprot database is used this time: uniprot\_human\_20210621\_202249.fasta. When searching the library, submitting the RAW file to SequestHT through Proteome Discoverer, selecting the established database, and then searching the database. The search parameters were as follows: monoisotopic mass, trypsin digestion, maximum 2 missing cut sites, peptides Charged number: 2+, 3+ and 4+, fixed modification to carbamidomethylation (C), dynamic modification to oxidation (M), Acethyl (protein N-term), Deamidated [N] and Phospho (S, T, Y). The maximum error of the precursor ion was 10 ppm, and the maximum error of the fragment ion was 0.05 Da. Proteome Discoverer 2.4 performs Peptide high Confidence screening based on the peptide identification results and outputted the results.

### **The protocol of actual biological sample analysis with nano-LC-MS/MS**

1 mg of hydrazide-POPs-Ti<sup>4+</sup> was added into 100  $\mu$ L of loading buffer containing a determined amount of serum digestion. The mixed solution was incubated for 1 h at 37 °C, and removed supernatant by centrifugation. Then, the peptides-loaded hydrazide-POPs-Ti<sup>4+</sup> was washed with loading buffer for 3 times. Target peptides were eluted with  $2 \times 10$   $\mu$ L of eluent and used centrifugation to remove the particle to isolate the eluted peptide solution. Afterwards, the eluent was lyophilized and the lyophilized peptides were redissolved in NH<sub>4</sub>HCO<sub>3</sub> solution (25 mM) and then lyophilized. The obtained solution was employed for further nano-LC-MS/MS analysis.

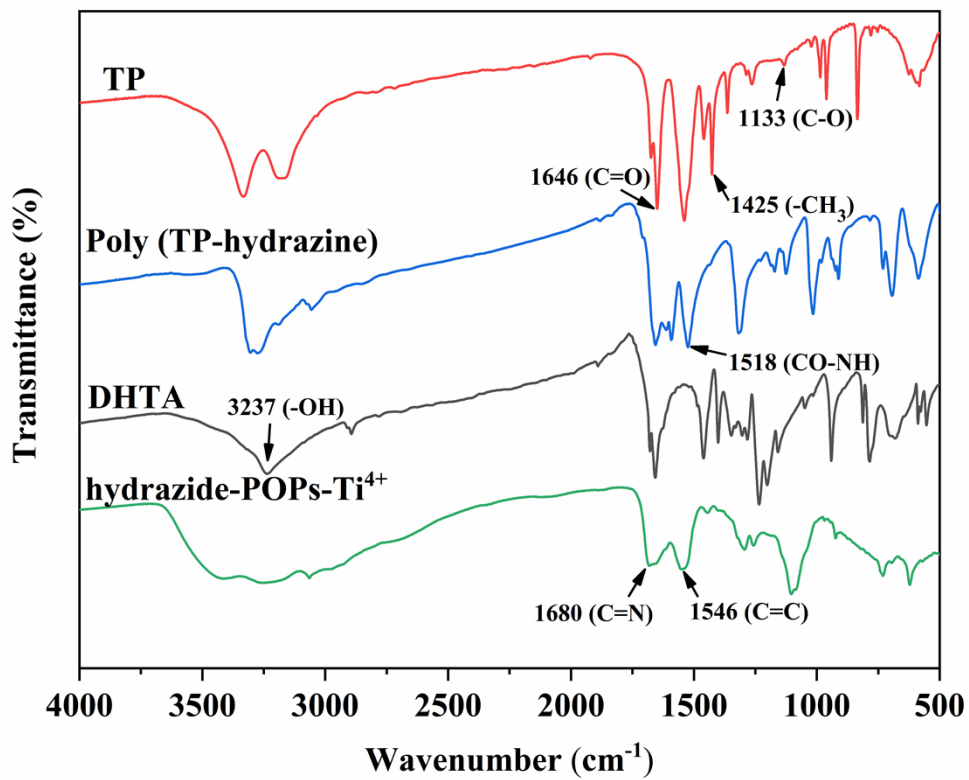

Fig. S1 The FT-IR spectra of TP, Poly (TP-hydrazine), DHTA and hydrazide-POPs-Ti<sup>4+</sup>.

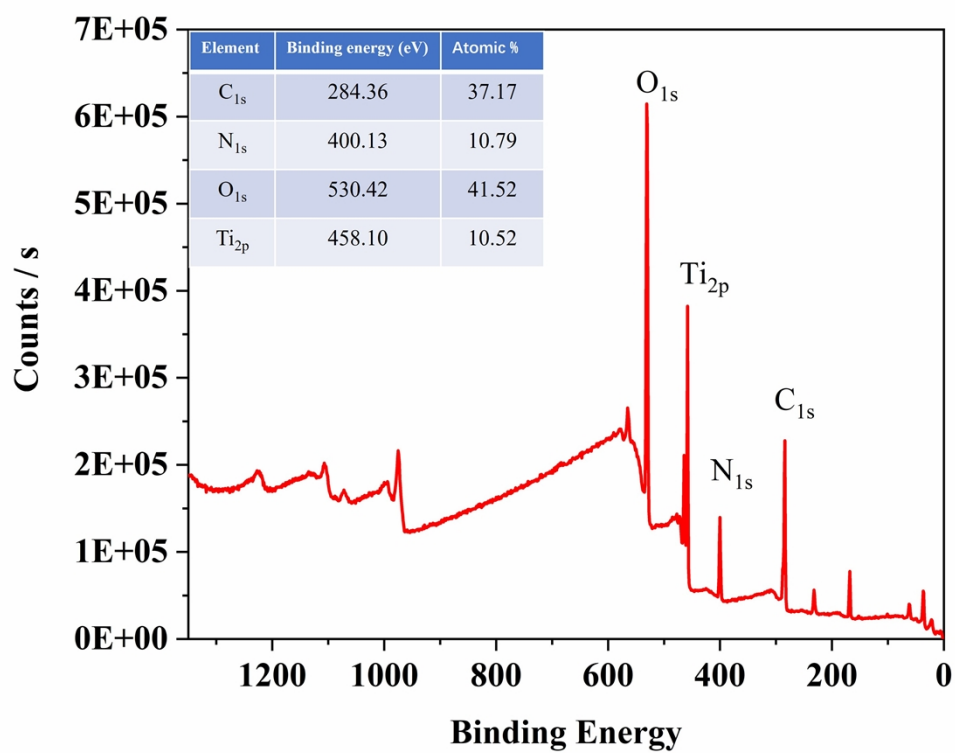

**Fig. S2** The XPS spectra of hydrazide-POPs-Ti<sup>4+</sup>.

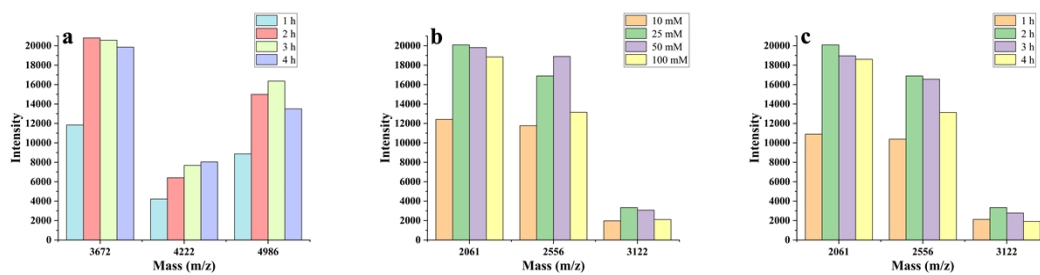

**Fig. S3 (a)** The enrichment performance of hydrazide-POPs materials prepared at different time.

The enrichment performance of hydrazide-POPs-Ti<sup>4+</sup> materials prepared at different concentrations

(b) and time (c).

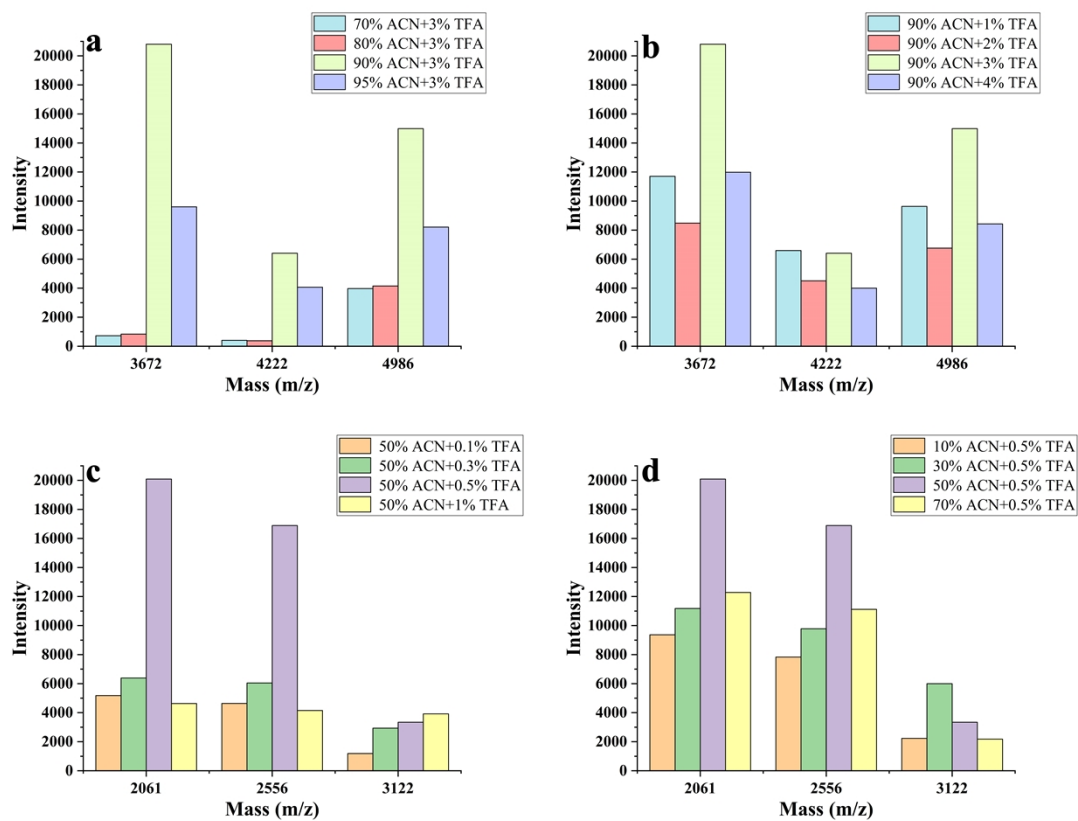

**Fig. S4** Optimization of enrichment of glycopeptides (a, b) and phosphopeptides (c, d) by hydrazide-POPs-Ti<sup>4+</sup> with different loading buffer.

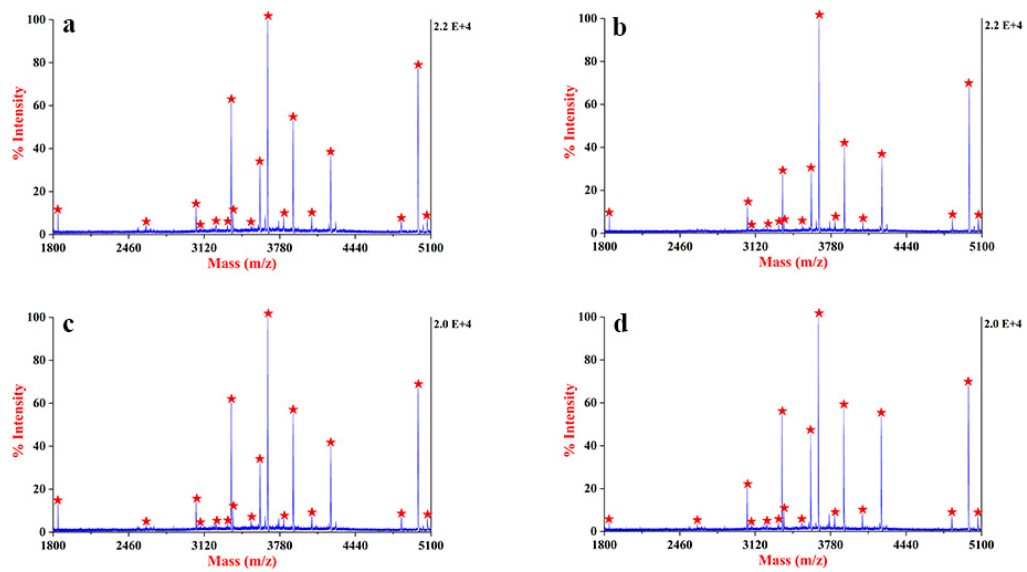

**Fig. S5** MS spectra analysis of glycopeptides from HRP digests after enriched by hydrazide-POPs-Ti<sup>4+</sup>: (a) the first time, (b) the fourth time, (c) the seventh time, and (d) the tenth time.

Glycopeptides peaks are marked with “★”.



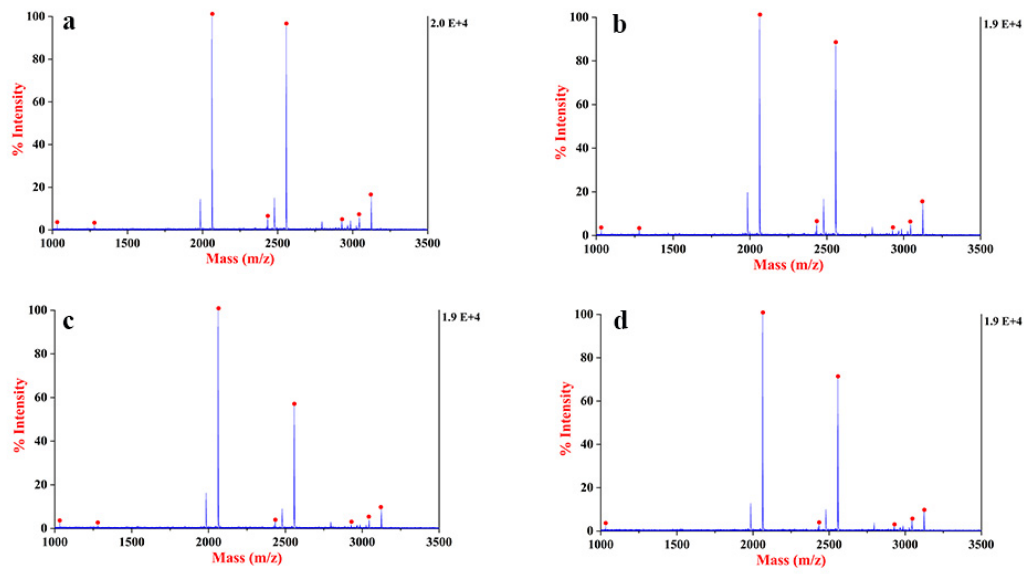

**Fig. S6** MS spectra analysis of phosphopeptides from  $\beta$ -casein digests after enriched by hydrazide-POPs-Ti<sup>4+</sup>: (a) the first time, (b) the fourth time, (c) the seventh time, and (d) the tenth time.

Phosphopeptide peaks are marked with “•”.

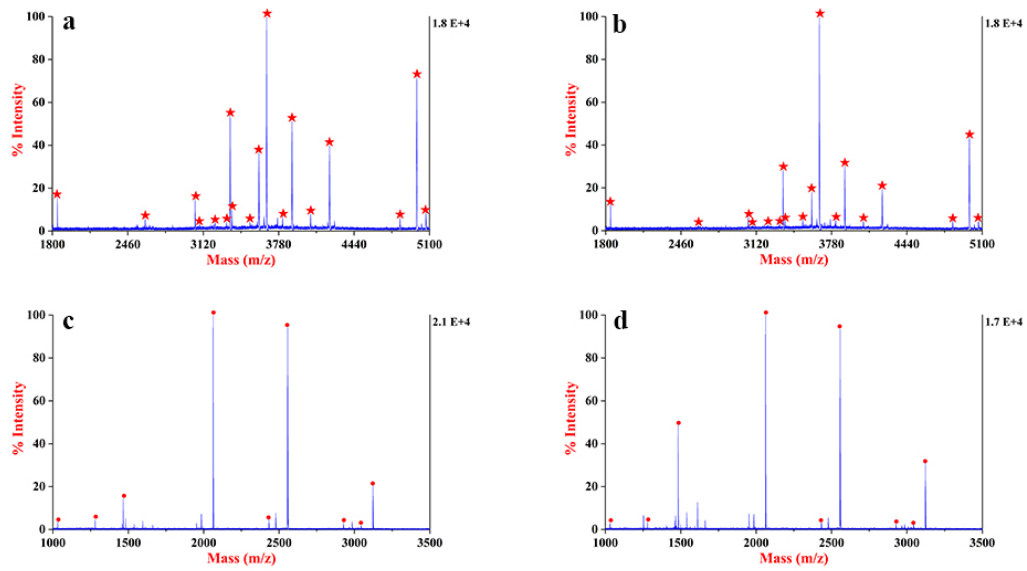

**Fig. S7** MS spectra analysis of hydrazide-POPs-Ti<sup>4+</sup> enriched glycopeptides and phosphopeptides with different pH. pH=3: (a) glycopeptides, (c) phosphopeptides; pH=11: (b) glycopeptides, (d) phosphopeptides. Glycopeptides peaks are marked with “★”. Phosphopeptide peaks are marked with “•”.

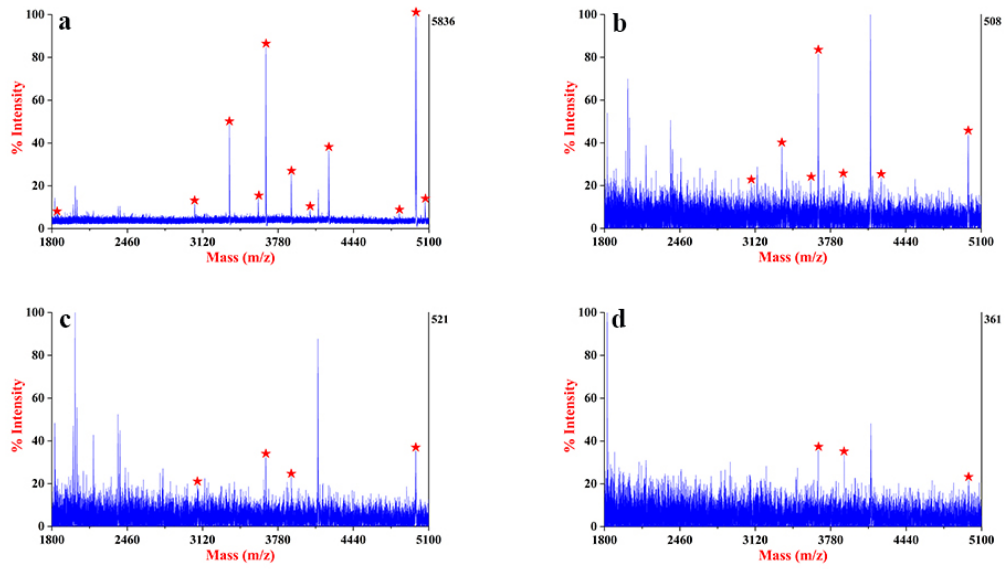

**Fig. S8** MS spectra of enriched glycopeptides from a mixture of HRP and BSA with different molar ratio, (a) 1:100, (b) 1:500, (c) 1:1000, (d) 1:2000, glycopeptides peaks are signed as “★”.

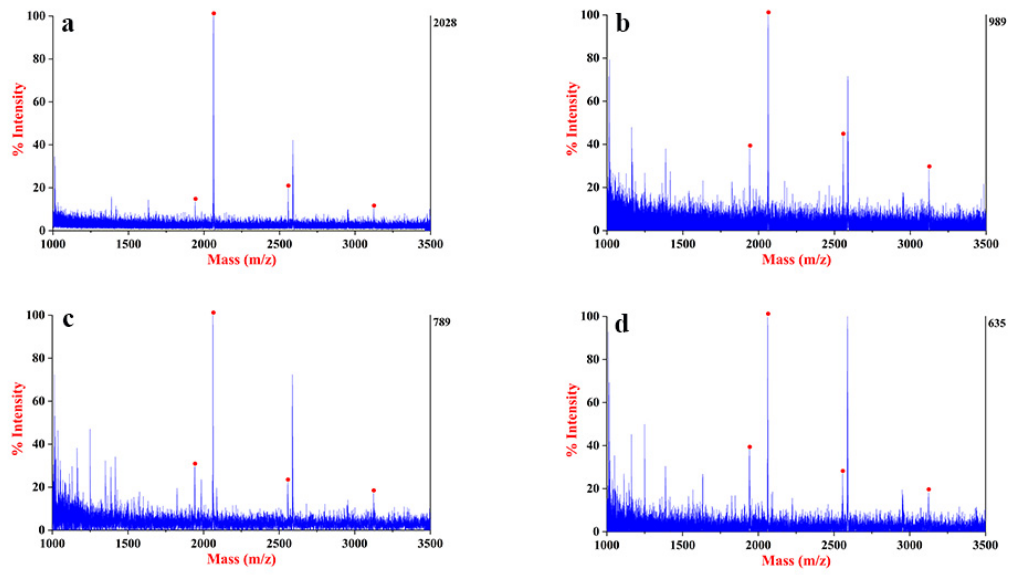

**Fig. S9** MS spectra of enriched phosphopeptides from a mixture of  $\beta$ -casein and BSA with different molar ratio, (a) 1:100, (b) 1:250, (c) 1:500, (d) 1:1000, phosphopeptides peaks are signed as “•”.

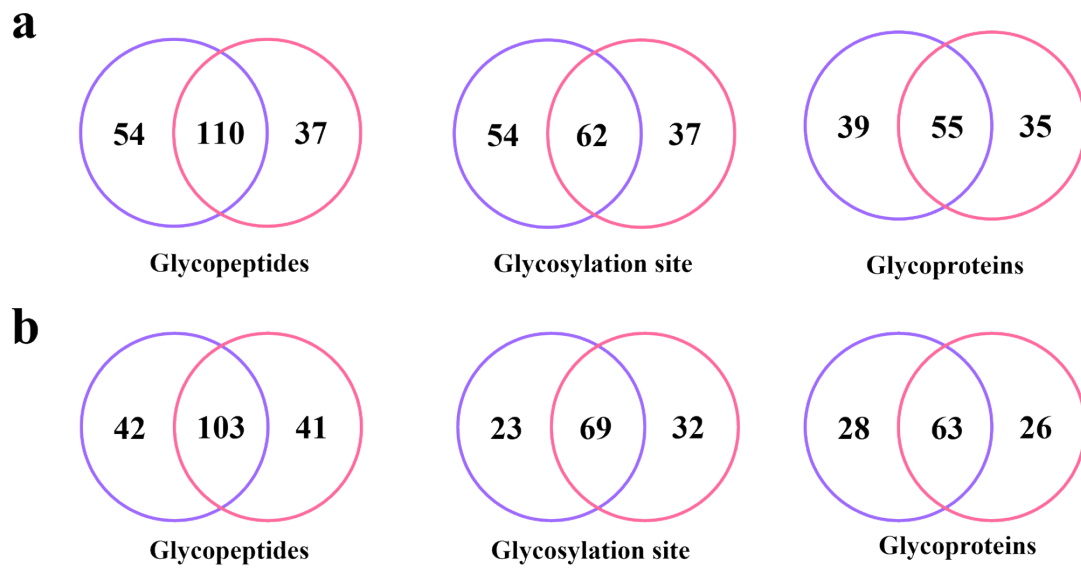

**Fig. S10** Venn diagram of glycopeptides, glycosylation sites, and glycoproteins of (a) normal controls and (b) breast cancer patients.

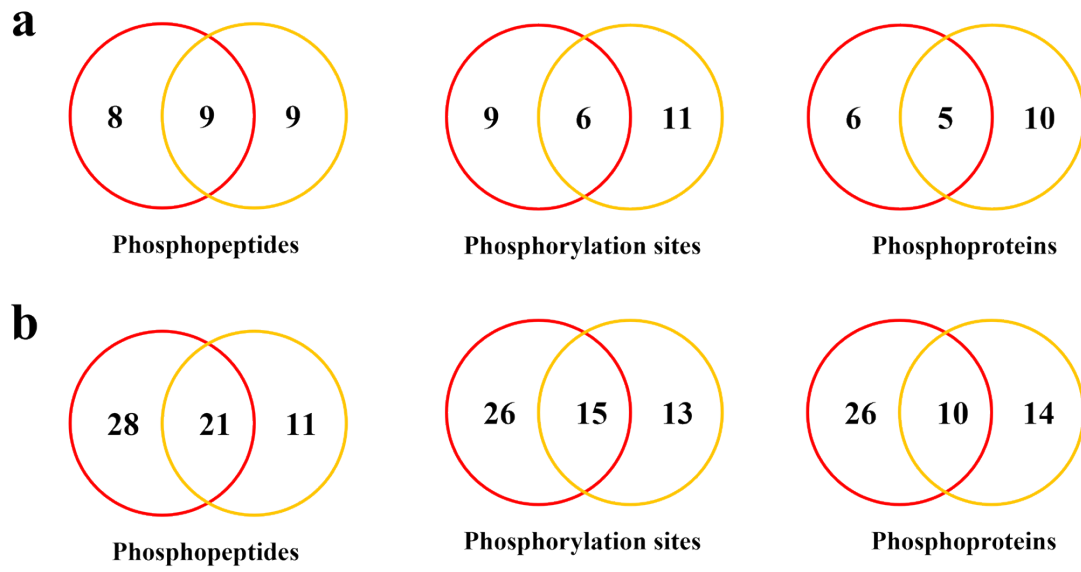

**Fig. S11** Venn diagram of phosphopeptides, phosphorylation sites, and phosphoproteins of (a) normal controls and (b) breast cancer patients.

**Table S1** The detailed information of glycopeptides derived from HRP after enrichment by hydrazide-POPs-Ti<sup>4+</sup> composites.

| No. | m/z  | Sequence Glycan composition                                                          | Amino acid sequence                                  |
|-----|------|--------------------------------------------------------------------------------------|------------------------------------------------------|
| 1   | 1842 | XylMan <sub>3</sub> FucGlcNAc <sub>2</sub>                                           | NVGLN#R                                              |
| 2   | 2544 | XylMan <sub>3</sub> FucGlcNAc <sub>2</sub>                                           | SSPN#ATDTIPLVR                                       |
| 3   | 2591 | XylMan <sub>3</sub> FucGlcNAc <sub>2</sub>                                           | PTLN#TTYLQTLR                                        |
| 4   | 2612 | XylMan <sub>3</sub> GlcNAc <sub>2</sub>                                              | MGN#ITPLTGTQGQIR                                     |
| 5   | 3048 | XylMan <sub>2</sub> GlcNAc <sub>2</sub>                                              | SFAN#STQTFNFAFVEAMDR                                 |
| 6   | 3088 | XylMan <sub>3</sub> FucGlcNAc <sub>2</sub>                                           | GLCPLNGN#LSALVDFDLR                                  |
| 7   | 3323 | XylMan <sub>3</sub> FucGlcNAc <sub>2</sub>                                           | QLTPTFYDNSCPN#VSNIVR                                 |
| 8   | 3354 | XylMan <sub>3</sub> FucGlcNAc <sub>2</sub>                                           | SFAN#STQTFNFAFVEAMDR                                 |
| 9   | 3369 | XylMan <sub>3</sub> FucGlcNAc <sub>2</sub>                                           | SFAN#STQTFNFAFVEAM*DR                                |
| 10  | 3540 | Man <sub>3</sub> FucGlcNAc <sub>2</sub>                                              | GLIQSDQELFSSPN#ATDTIPLVR                             |
| 11  | 3606 | XylMan <sub>3</sub> FucGlcNAc <sub>2</sub>                                           | NQCRGLCPLNGN#LSALVDFDLR                              |
| 12  | 3672 | XylMan <sub>3</sub> FucGlcNAc <sub>2</sub>                                           | GLIQSDQELFSSPN#ATDTIPLVR                             |
| 13  | 3895 | XylMan <sub>3</sub> FucGlcNAc <sub>2</sub>                                           | LHFHDCFVNGCDASILLDN#TTSFR                            |
| 14  | 4057 | XylMan <sub>3</sub> GlcNAc <sub>2</sub>                                              | QLTPTFYDNSC(AAVESACPR)PN#V<br>SNIVR-H <sub>2</sub> O |
| 15  | 4223 | XylMan <sub>3</sub> FucGlcNAc <sub>2</sub>                                           | QLTPTFYDNSC(AAVESACPR)PN#V<br>SNIVR                  |
| 16  | 4720 | Man <sub>3</sub> FucGlcNAc <sub>2</sub> ,<br>Man <sub>3</sub> FucGlcNAc <sub>2</sub> | LYN#FSNTGLPDPTLN#TTYLQTLR                            |

|    |      |                                         |                                     |
|----|------|-----------------------------------------|-------------------------------------|
| 17 | 4823 | XylMan2FucGlcNAc2,<br>XylMan2GlcNAc2    | LYN#FSNTGLPDPTLN#TTYLQTLR           |
| 18 | 4838 | XylMan3FucGlcNAc2,<br>XylMan3GlcNAc2    | LYN#FSNTGLPDPTLN#TTYLQTLR           |
| 19 | 4854 | Man3FucGlcNAc2,<br>XylMan3FucGlcNAc2    | LYN#FSNTGLPDPTLN#TTYLQTLR           |
| 20 | 4985 | XylMan3FucGlcNAc2,<br>XylMan3FucGlcNAc2 | LYN#FSNTGLPDPTLN#TTYLQTLR           |
| 21 | 5068 | Xyl Man3GlcNAc2                         | QLTPTFYDNSC(AAVESACPR)PN#V<br>SNIVR |



**Table S2** The detailed information of phosphopeptides derived from  $\beta$ -casein after enrichment by hydrazide-POPs-Ti<sup>4+</sup>.

| No. | m/z    | Amino acid sequence                      | Numbers of Phosphorylation site |
|-----|--------|------------------------------------------|---------------------------------|
| 1   | 1030.9 | FQ[pS]EEQQQTEDELQDK                      | 1                               |
| 2   | 1539.4 | EQL[pS]T[pS]EENSKK                       | 2                               |
| 3   | 1562.1 | RELEELNVPGEIVESL[pS][pS][pS]EE[pS]ITR    | 4                               |
| 4   | 1926.7 | DIG[pS]E[pS]TEDQAMEDIK                   | 2                               |
| 5   | 1942.7 | DIG[pS]E[pS]TEDQA[Mo]EDIKa               | 2                               |
| 6   | 2061.9 | FQ[pS]EEQQQTEDELQDK                      | 1                               |
| 7   | 2925.7 | RELEELNVPGEIVE[pS]L[pS][pS][pS]EESITR    | 4                               |
| 8   | 2966.0 | ELEELNVPGEIVE[pS]L[pS][pS][pS]EESITR     | 4                               |
| 9   | 3007.3 | NANEEYSIG[pS][pS][pS]EE[pS]AEVATEEV<br>K | 4                               |
| 10  | 3042.3 | RELEELNVPGEIVESL[pS][pS][pS]EESITR       | 3                               |
| 11  | 3122.5 | RELEELNVPGEIVE[pS]L[pS][pS][pS]EESITR    | 4                               |

**Table S3** Comparison with other materials that have been used to enrich glycopeptides and phosphopeptides in recent years.

| <b>Materials</b>                                                   | <b>Number<br/>(glycopeptides/<br/>phosphopeptides)</b> | <b>Selectivity<br/>(glycopeptides/<br/>phosphopeptides)</b> | <b>LOD<br/>(glycopeptides/<br/>phosphopeptides)</b> | <b>Reusability<br/>(glycopeptides/<br/>phosphopeptides)</b> | <b>Reference</b> |
|--------------------------------------------------------------------|--------------------------------------------------------|-------------------------------------------------------------|-----------------------------------------------------|-------------------------------------------------------------|------------------|
| Fe <sub>3</sub> O <sub>4</sub> @PDA@mTiO <sub>2</sub> @PEI-g-ZIF-8 | 11 (HRP)/<br>7 (β-casein)                              | 1:1000/1:1000                                               | 0.04/0.04 fmol/μL                                   | 5/5 cycles                                                  | 1                |
| Fe <sub>3</sub> O <sub>4</sub> @MIL-100(Fe)                        | 22 (HRP)/<br>11 (β-casein)                             | 1:20/1:50                                                   | 0.1/0.1 fmol/μL                                     | 6/6 cycles                                                  | 2                |
| Fe <sub>3</sub> O <sub>4</sub> @ILI-01@Ti <sup>4+</sup>            | 25 (HRP)/<br>11 (β-casein)                             | 1:100/1:1000                                                | 2/0.08 fmol/μL                                      | 5/5 cycles                                                  | 3                |
| mMIL-125@Au@L-Cys                                                  | 26 (HRP)/<br>12 (β-casein)                             | 1:100/1:100                                                 | 0.1/0.1 fmol/μL                                     | 5/5 cycles                                                  | 4                |
| HHZr-MOFs                                                          | 22 (HRP)/<br>3 (β-casein)                              | 1:1000/1:2000                                               | 0.5/0.1 fmol/μL                                     | /                                                           | 5                |
| hydrazide-POPs-Ti <sup>4+</sup>                                    | 18 (HRP)/<br>9 (β-casein)                              | 1:2000/<br>1:1000                                           | 0.1/0.005 fmol/μL                                   | 10/10 cycles                                                | This<br>work     |

‘/’ not given

**Table S4** Details of enriched glycopeptides derived from serum of the breast cancer patients and healthy people by hydrazide-POPs-Ti<sup>4+</sup> composites. n: N-glycosylation site.

| No.                                                                                         | Amino acid Sequence                                              | Protein Group<br>Accessions   | MH+[Da]    |
|---------------------------------------------------------------------------------------------|------------------------------------------------------------------|-------------------------------|------------|
| Glycopeptides were detected in the serum of both normal subjects and breast cancer patients |                                                                  |                               |            |
| 1                                                                                           | FSLLGHASISCTVE <sub>n</sub> ETIGVWRPSP<br>PTCEK                  | P04003; B4E1D8                | 3373.61914 |
| 2                                                                                           | ADTHDEILEGLN <sub>Fn</sub> LTEIPEAQIHE<br>GFQELLR                | P01009                        | 3692.80786 |
| 3                                                                                           | VDKDLQSLEDILHQVE <sub>n</sub> K                                  | A0A140VJJ6                    | 2124.0819  |
| 4                                                                                           | ELHHLQE <sub>Qn</sub> VSNAFLDKGEFYIGS<br>K                       | A5PL27                        | 2904.41626 |
| 5                                                                                           | LGHCPDPVLVNGEFSSSGPV <sub>n</sub> VSD<br>K                       | P20851                        | 2613.21372 |
| 6                                                                                           | <sub>Fn</sub> L <sub>TET</sub> SEAEIHQSFQHLLR                    | A0A024R6P0                    | 2401.17826 |
| 7                                                                                           | LSLHRPALEDLLL <sub>GSEAn</sub> LTCTLTG<br>LR                     | Q9NPP6; Q96K68;<br>A0A286YEE5 | 2964.58228 |
| 8                                                                                           | QLVEIEKVV <sub>LHPn</sub> YSQVDIGLIK                             | P00738                        | 2635.47053 |
| 9                                                                                           | MVSHH <sub>n</sub> LTGATLINEQWLLTTA<br>K                         | P00739; P00738                | 2680.37631 |
| 10                                                                                          | DIAPTLTLYVGKKQLVEIEKVV <sub>LH</sub><br><sub>Pn</sub> YSQVDIGLIK | P00738                        | 4035.27803 |
| 11                                                                                          | DTAVFECLPQHAMFGNDTITCTTH<br><sub>Gn</sub> WTK                    | D9IWP9                        | 3354.45002 |
| 12                                                                                          | AALAAFNAQ <sub>Nn</sub> GSNFQLEEISR                              | P02765                        | 2366.13713 |
| 13                                                                                          | V <sub>LHPn</sub> YSQVDIGLIK                                     | P00738                        | 1795.99526 |
| 14                                                                                          | SQILEGLGF <sub>n</sub> LTELSESDVHR                               | P29622                        | 2345.16195 |
| 15                                                                                          | EGY <sub>Sn</sub> ISYIVVNHQGISSR                                 | P49908                        | 2124.03562 |

|    |                                      |                |            |
|----|--------------------------------------|----------------|------------|
| 16 | SLGNVnFTVSAEALESQELCGTEV<br>PSVPEHGR | P01023         | 3414.6118  |
| 17 | LPTQnITFQTESSVAEQEAEFQSPK            | B7ZKJ8         | 2810.33667 |
| 18 | ADGTVNQIEGEATPVnLTEPAK               | C9JF17         | 2255.10376 |
| 19 | ADTHDEILEGLNFnLTEIPEAQIH             | G3V387         | 2720.30498 |
| 20 | LSDLSInSTECLHVHCR                    | P05156; Q6LAM1 | 2041.94299 |
| 21 | ELHHLQEQnVSNAFLDK                    | A5PL27         | 2022.98794 |
| 22 | SVQEIQATFFYFTPnKTEDTIFLR             | P02763; P19652 | 2896.44035 |
| 23 | VSnQTLSLFFTVLQDVPVR                  | P01023         | 2164.16485 |
| 24 | LSHNELADSGIPGNSFnVSSLVELD<br>LSYNK   | A0A384N669     | 3220.56444 |
| 25 | LDAPTNLQFVnETDSTVLVR                 | A0A024R462     | 2233.13467 |
| 26 | LGSFEGLVnLTFIHLQHNR                  | A0A384N669     | 2196.15601 |
| 27 | VIDFnCTTSSVSSALANTK                  | B2R8I2; P04196 | 2015.95901 |
| 28 | AFEnVTDLQWLILDHNLLENSK               | A0A384N669     | 2613.31951 |
| 29 | DIVEYYnDSNGSHVLQGR                   | A0A140VK00     | 2066.94139 |
| 30 | VGQLQLSHnLSLVILVPQNLK                | Q5UGI6         | 2314.34929 |
| 31 | AVnITSENLIDDVVSLIR                   | A0A024R035     | 1972.05971 |
| 32 | AGLQAFFQVQECnK                       | A5PL27         | 1640.77372 |
| 33 | SPYYnVSDEISFHCYDGYTLR                | B4E1Z4         | 2587.1082  |
| 34 | MLnTSSLLEQLNEQFNWVSR                 | A0A384NKS6     | 2410.17074 |
| 35 | HYTnSSQDVTVPCR                       | A0A286YHEY5    | 1664.73331 |
| 36 | NPPMGGNVVIFDTVITNQEEPYN<br>HSGR      | X6RLJ0         | 3114.45854 |
| 37 | FEVDSVPYnATWSASLK                    | C0JYY2         | 1914.91199 |
| 38 | EEQFnSTFRVSVLTVVHQDWLN<br>GK         | Q6N093         | 2934.46321 |

|    |                               |                               |            |
|----|-------------------------------|-------------------------------|------------|
| 39 | LEPVHLQLQCMSQEQLAQVAAnA<br>TK | Q96PD5                        | 2808.40187 |
| 40 | EEQYnSTYRVVSVLTVLHQDWLN<br>GK | Q7Z351                        | 2980.46869 |
| 41 | QEPERnECFLQHK                 | P02768; F6KPG5                | 1715.78059 |
| 42 | KVCQDCPLLAPLnDTR              | P02765                        | 1900.92554 |
| 43 | LHINHnNLTESVGPLPK             | A0A384N669                    | 1883.99739 |
| 44 | NnATVHEQVGGPSLTSDLQAQSK       | D9ZGG2                        | 2383.13719 |
| 45 | FSDGLESnSSTQFEVK              | F5GXS0; B7Z1F8;<br>A0A140TA32 | 1775.79702 |
| 46 | QNQCFYnSSYLVNQR               | P19652                        | 1921.84974 |
| 47 | QVLFLDTVYGnCSTHFTVK           | C0JYY2                        | 2230.08488 |
| 48 | GLTFQQnASSMCVPDQDPAIR         | P01871                        | 2340.05947 |
| 49 | QQQHLFGSnVTDCSGnFCLFR         | P02787                        | 2516.10815 |
| 50 | SRPAnHCVFYFYGDEISFSCHETSR     | P04003; B4E1D8                | 2920.24135 |
| 51 | EHEGAIYPDnTTDFQR              | A5PL27                        | 1893.82496 |
| 52 | NLFLNHSEnATAK                 | P00739; P00738                | 1461.68562 |
| 53 | VCQDCPLLAPLnDTR               | P02765                        | 1772.83058 |
| 54 | VTQVYAEEnGTVLQGSTVASVYK       | P27169                        | 2315.17653 |
| 55 | YTGnASALFILPDQDK              | A0A024R6P0                    | 1753.86431 |
| 56 | LYLGSNnLTALHPALFQNLISK        | P22792                        | 2316.22342 |
| 57 | GGSSGWSGGLAQnR                | A0A8Q3WKN4                    | 1334.60837 |
| 58 | HAnWTLTPLK                    | P27169                        | 1181.63133 |
| 59 | LSLLEEPGnGTFTVILNQLTSR        | P01833                        | 2403.27658 |
| 60 | WFSAGLASnSSWLR                | Q5SQ11                        | 1582.76487 |
| 61 | FnSSYLQGTNQTGR                | C0JYY2                        | 1686.80819 |
| 62 | TVLTPATNHMGnVTFTIPANR         | P01024                        | 2256.14413 |

|    |                                                                 |                    |            |
|----|-----------------------------------------------------------------|--------------------|------------|
| 63 | LNAEN <sub>n</sub> ATFYFK                                       | B4E1C2             | 1432.67432 |
| 64 | QVFPGL <sub>n</sub> YCTSGAYS <sub>n</sub> ASSTDSAS<br>YYPLTGDTR | C0JYY2             | 3552.53836 |
| 65 | TELFSSSCP <sub>g</sub> GIML <sub>n</sub> ETGQGYQR               | A0A1U9X793         | 2533.13336 |
| 66 | QSVPAHFVAL <sub>n</sub> GSK                                     | F2Z3N2; B4E1Z4     | 1455.75905 |
| 67 | YLG <sub>n</sub> ATAIFFLPDEGK                                   | P01009             | 1756.87923 |
| 68 | AFIT <sub>n</sub> FSMIIDGMTYPGIIK                               | B7ZKJ8             | 2233.12833 |
| 69 | ALGFEnATQALGR                                                   | Q08380             | 1348.68555 |
| 70 | V <sub>n</sub> VSCQASVSR                                        | P55058             | 1294.60559 |
| 71 | LQNNEN <sub>n</sub> ISCVER                                      | P36980; B1AKG0     | 1590.71766 |
| 72 | LGAC <sub>n</sub> DTLQQLMEVFK                                   | P01008             | 1867.89285 |
| 73 | ISEEnETTCYMGK                                                   | A0A024R962         | 1562.6349  |
| 74 | VYKPSAG <sub>n</sub> NSLYR                                      | D9IWP9             | 1470.72233 |
| 75 | SPDVInGSPISQK                                                   | A0A024R962         | 1342.68489 |
| 76 | YK <sub>n</sub> NSDISSTR                                        | P01871             | 1285.60188 |
| 77 | LAnLTQGEDQYYLR                                                  | A0A384NKS6         | 1684.81769 |
| 78 | YAEDKFnETTEK                                                    | P43652             | 1475.65365 |
| 79 | CIQAnYSLMENGK                                                   | C9JF17             | 1528.67704 |
| 80 | MDGAS <sub>n</sub> VTCINSR                                      | A0A024R962         | 1425.60969 |
| 81 | nTTCQDLQIEVTVK                                                  | F5GXS0; A0A140TA32 | 1649.80508 |
| 82 | nCCNTENPPGCYR                                                   | P43652             | 1642.60429 |
| 83 | ANQQL <sub>n</sub> FTEAK                                        | Q9Y5Y7             | 1264.61681 |
| 84 | IDSTG <sub>n</sub> VTNELR                                       | B4DZ36             | 1319.64375 |
| 85 | FSGSGSGTDF <sub>n</sub> LTISR                                   | A0A5C2FVK9         | 1646.76566 |
| 86 | AnLSSQALR                                                       | B7Z539             | 960.51089  |
| 87 | EVFVHP <sub>n</sub> YSK                                         | Q8J009             | 1220.59461 |
| 88 | YDF <sub>n</sub> SSMLYSTAK                                      | C0JYY2             | 1527.66719 |

|     |                 |                |            |
|-----|-----------------|----------------|------------|
| 89  | SWPAVGnCSSALR   | P02790         | 1405.65287 |
| 90  | nLTSLTESVDR     | P80108         | 1336.65907 |
| 91  | AAIPSALDTnSSK   | Q08380         | 1275.64269 |
| 92  | CGLVPVLAENYNK   | P02787         | 1477.73554 |
| 93  | ITYSIVQTnCSK    | B4E1C2         | 1414.68826 |
| 94  | EnISDPTSPLR     | D6RHJ6         | 1229.60082 |
| 95  | FLNnGTCTAEGK    | P05156; Q6LAM1 | 1312.58379 |
| 96  | LQnLTLPTnASIK   | Q13201         | 1414.77879 |
| 97  | AGPnGTLFVADAYK  | H0Y512         | 1424.70562 |
| 98  | KLPPGLLAnFTLLR  | P02750         | 1553.94138 |
| 99  | EEQFnSTYR       | A0A286YFJ8     | 1174.50111 |
| 100 | CGnCSLTTLK      | P49908         | 1154.51802 |
| 101 | IGGIWTWVGTnK    | P14151         | 1332.69466 |
| 102 | EEQFnSTFR       | Q6N093         | 1158.50619 |
| 103 | DAGVVCTnETR     | Q08380         | 1222.53684 |
| 104 | VELEDFNGnR      | Q6UY50         | 1193.54331 |
| 105 | ELLETVVnR       | K7ER74         | 1073.58372 |
| 106 | LGnWSAMPCK      | D9IWP9         | 1251.54966 |
| 107 | nFTENDLLVR      | P00734         | 1221.61099 |
| 108 | nLSMPLLPADFHK   | P05546         | 1483.76136 |
| 109 | DIENFnSTQK      | P43652         | 1196.54297 |
| 110 | EEQYnSTFR       | A0A4W9A917     | 1174.50111 |
| 111 | EGHFYYnISEVK    | P55058         | 1486.68489 |
| 112 | FGCEIENnR       | A0A140VK00     | 1140.46261 |
| 113 | CFLGnGTGYR      | D6RAR4         | 1145.50442 |
| 114 | YNSQnQSNNQFVLYR | B4E1C2         | 1876.84603 |

|     |                                       |                           |            |
|-----|---------------------------------------|---------------------------|------------|
| 115 | EEQYnSTYR                             | Q7Z351                    | 1190.49602 |
| 116 | EDALnETR                              | A0A384NKS6                | 948.42688  |
| 117 | LDVDQALnR                             | I3L145                    | 1044.53201 |
| 118 | IGEADFnR                              | P04275                    | 922.42649  |
| 119 | DFYVDEnTTVR                           | P29622                    | 1359.6063  |
| 120 | EWDnTTTECR                            | P20851                    | 1312.51102 |
| 121 | GAFISnFSMTVDGK                        | P19823                    | 1474.68826 |
| 122 | nECFLQHK                              | P02768; F6KPG5            | 1076.48296 |
| 123 | LPPGLLAnFTLLR                         | P02750                    | 1425.84641 |
| 124 | GLnVTLSSTGR                           | F5GXS0; A0A140TA32        | 1105.58478 |
| 125 | DTFVnASR                              | Q5UGI6                    | 910.42649  |
| 126 | THTNISESHPhnATFSAVGEASICED<br>DWNSGER | P01871                    | 3520.48297 |
| 127 | EEQFnSTFRVVSVLTVVHQDWLN<br>GKEYK      | Q6N093                    | 3353.68008 |
| 128 | THTnISESHPhnATFSAVGEASICED<br>DDWSGER | P0DOX6                    | 3521.46699 |
| 129 | LAGKPTHVnVSVVMAEVDGTCY                | Q96DK0; Q9NPP6;<br>Q96K68 | 2348.12609 |
| 130 | ALPQPQnVTSLLGCTH                      | P02790                    | 1736.8636  |
| 131 | NPVGLIGAEEnATGETDP SHSK               | A0A5F9ZH15                | 2094.99382 |
| 132 | VLAEAMSHAnSSIMMQRGNFR                 | A0A5J6A018                | 2368.08425 |
| 133 | TLnQSSDELQLSMGNAMFVK                  | A0A024R6P0                | 2214.0417  |
| 134 | nNSDISSTR                             | P01871                    | 994.44359  |
| 135 | VTISCSGnSSNIGR                        | A0A5C2GGK1                | 1453.65875 |
| 136 | FnDTEVLQR                             | A0A5F9ZH15                | 1122.54258 |
| 137 | GLCVnASAVSR                           | A6XND1                    | 1134.55718 |



|                                             |                                                             |                    |            |
|---------------------------------------------|-------------------------------------------------------------|--------------------|------------|
| 138                                         | TMFP <sub>n</sub> LTDVR                                     | F2Z3N2; B4E1Z4     | 1194.58234 |
| 139                                         | nGTLVAFR                                                    | Q92954             | 878.47304  |
| 140                                         | GV <sub>n</sub> VCQETCTK                                    | A8K9A9             | 1296.55586 |
| 141                                         | LNVEAA <sub>n</sub> WTVR                                    | P80108             | 1273.65353 |
| 142                                         | MFSQ <sub>n</sub> DTR                                       | P02750             | 999.42002  |
| 143                                         | C <sub>n</sub> ECGKAFSTK                                    | Q92970             | 1302.5453  |
| Glycopeptides detected only in normal serum |                                                             |                    |            |
| 1                                           | QLVEIEKVVLP <sub>n</sub> YSQVDIGLIKLK                       | P00738             | 2876.64956 |
| 2                                           | GLKF <sub>n</sub> LTETSEAEIHQSFQHLLR                        | A0A024R6P0         | 2699.37875 |
| 3                                           | LGAC <sub>n</sub> DTLQQLMEVFKFDTISEK                        | P01008             | 2688.28953 |
| 4                                           | ADGTVNQIEGEATPV <sub>n</sub> LTEPAKLE<br>VK                 | C9JF17             | 2724.3938  |
| 5                                           | nGTGHGNSTHHGPEYMR                                           | P02790             | 1853.76198 |
| 6                                           | FVEGSH <sub>n</sub> STVSLTTK                                | C0JYY2             | 1607.79114 |
| 7                                           | IGPGQTFYAVGDIIGDIRQAHCNIS<br>EKDW <sub>n</sub> KTLEDVK      | A0A286LHX8         | 4189.06588 |
| 8                                           | SRYPHKPEI <sub>n</sub> STTHPGADLQENFCR                      | P00734             | 2955.38023 |
| 9                                           | QGFGNVATNTDGK <sub>n</sub> YCGLPGEYW<br>LGNDK               | P02675             | 3076.37414 |
| 10                                          | nECFLQHKDDNP <sub>n</sub> LPR                               | P02768; F6KPG5     | 1997.9134  |
| 11                                          | TERPLSSGVYMG <sub>n</sub> LSAQQLEQRRS<br>LLNMIGMVGGAQGTQPGR | A0A3G2CH15         | 4521.23952 |
| 12                                          | GL <sub>n</sub> VTLSSSTGRNGFK                               | F5GXS0; A0A140TA32 | 1552.79656 |
| 13                                          | KLHINH <sub>n</sub> LTESVGPLPK                              | A0A384N669         | 2012.09235 |
| 14                                          | IY <sub>n</sub> HSALESLALIPLQAPLK                           | P55058             | 2279.26456 |
| 15                                          | DQCIVDDITYNV <sub>n</sub> DTFHK                             | A0A024R462         | 2197.97064 |
| 16                                          | YTAFTIPSIN <sub>n</sub> KTPEIRYQYNVLPQ                      | A0A290DUA5         | 3344.68377 |

|    |                                                                                      |            |            |
|----|--------------------------------------------------------------------------------------|------------|------------|
|    | GWK                                                                                  |            |            |
| 17 | LQAILGVPWKDKnCTSR                                                                    | Q86U78     | 1987.04296 |
| 18 | VTQVYAE <sub>n</sub> GTVLQGSTVASVYKG<br>K                                            | P27169     | 2500.29296 |
| 19 | RNPPMGGNVVIFDTVITNQEEPQ<br>nHSGR                                                     | X6RLJ0     | 3270.55965 |
| 20 | AATCINPL <sub>n</sub> GVCERPA <sub>n</sub> HSAK                                      | B4DZ36     | 2369.09725 |
| 21 | KEHETCLAPELYNG <sub>n</sub> YSTTQK                                                   | P05160     | 2485.11876 |
| 22 | GTAGNALMDGASQLMGE <sub>n</sub> R                                                     | P02675     | 1893.84294 |
| 23 | nVSCPQLEVPVCPSPGFQLSCK                                                               | P04275     | 2407.10906 |
| 24 | STGKPTLY <sub>n</sub> VSLVMSDTAGTCY                                                  | P01871     | 2366.08904 |
| 25 | AKVGQLQLSH <sub>n</sub> LSLVILVPQNLK                                                 | Q5UGI6     | 2513.48137 |
| 26 | ESPNNAKTIIVHL <sub>n</sub> ESVEI <sub>n</sub> CTRPS <sub>n</sub><br>NTRTSITMGPGHVFYR | Q8Q6G7     | 4755.33659 |
| 27 | nYSTQAGATQAGRFSITPAAPSYT<br>LKLGEYGEVTVDCEPR                                         | B3F776     | 4307.05611 |
| 28 | D <sub>n</sub> CCILDER                                                               | A0A140VJJ6 | 1195.4718  |
| 29 | nHSCEPCQTLAVR                                                                        | Q8IZZ5     | 1572.68934 |
| 30 | CATPHGD <sub>n</sub> ASLEATFVK                                                       | P23142     | 1818.83269 |
| 31 | DLQSLEDILHQVE <sub>n</sub> K                                                         | A0A140VJJ6 | 1781.89158 |
| 32 | EVYPWY <sub>n</sub> LTVEAK                                                           | Q59EA3     | 1612.78935 |
| 33 | WSDIW <sub>n</sub> ATK                                                               | F8WF14     | 1121.5262  |
| 34 | LIIY <sub>n</sub> ASNR                                                               | A0A5C2GHF1 | 1064.57349 |
| 35 | KDW <sub>n</sub> DTLQ <sub>n</sub> VTEK                                              | Q9J0Z8     | 1592.74386 |
| 36 | FGYILHTD <sub>n</sub> R                                                              | P48740     | 1236.60076 |
| 37 | F <sub>n</sub> GSGSGTDFTLK                                                           | A0A5C2G3W4 | 1331.61139 |
| 38 | EDGGGWY <sub>n</sub> R                                                               | P02675     | 1240.50178 |

|                                                    |                                                                      |                |            |
|----------------------------------------------------|----------------------------------------------------------------------|----------------|------------|
| 39                                                 | LDASIS <sub>n</sub> STSKRK                                           | P12757         | 1521.78673 |
| 40                                                 | SLGNV <sub>n</sub> FTVSAEAELESQELCGTEV<br>PSVPEHGRK                  | P01023         | 3542.70677 |
| 41                                                 | ICDLLVANNHFAHFFAPQ <sub>n</sub> LTNMN<br>K                           | B7Z539         | 2931.39164 |
| 42                                                 | NCGV <sub>n</sub> CSGDVFTALIGEIASPNYPK<br>PYPENSR                    | P09871         | 3527.62059 |
| 43                                                 | QQQHLFGS <sub>n</sub> VTDCSG <sub>n</sub> FCLFRSET<br>KDLLFRDDTVCLAK | B4E1B2; P02787 | 4509.09079 |
| 44                                                 | LATALSLSNKFVEGSH <sub>n</sub> STVSLTT<br>K                           | C0JYY2         | 2606.36719 |
| 45                                                 | LQAPL <sub>n</sub> YTEFQKPICLPSK                                     | A8K9A9         | 2248.16822 |
| 46                                                 | HQDFNSAVQLV <sub>n</sub> FCR                                         | P00734         | 1964.89194 |
| 47                                                 | QIVNMWQGTGQAMYAPPIRGPIN<br>CVS <sub>n</sub> ITGILLTRDGGDNNR          | K4NYZ3         | 4632.23919 |
| 48                                                 | CVPTDPNPQEIRL <sub>n</sub> VTENFNMWK                                 | F5B6A0         | 2933.34442 |
| 49                                                 | IYSGIL <sub>n</sub> LSDITK                                           | A8K9A9         | 1437.78354 |
| 50                                                 | AELS <sub>n</sub> HTRPVILVPGCLGNQLEAK                                | A0A140VK24     | 2618.36066 |
| 51                                                 | LETTV <sub>n</sub> YTDSQRPICLPSK                                     | P03951         | 2223.09617 |
| 52                                                 | NIYNYGGDISKMQMGI <sub>n</sub> PDDTYE<br>NVYQEP <sub>n</sub> VTR      | Q8NCR3         | 3904.73166 |
| 53                                                 | <sub>n</sub> HSCSE <sub>n</sub> QISIFR                               | B4DZ36         | 1535.69072 |
| 54                                                 | FSGSGSGTEF <sub>n</sub> LTISR                                        | A0A5C2FXG6     | 1660.78131 |
| 55                                                 | FSGSTSG <sub>n</sub> TTTLTISR                                        | Q5NV75         | 1630.79187 |
| 56                                                 | AQLLQGLGF <sub>n</sub> LTER                                          | B2R9F2         | 1560.83803 |
| 57                                                 | AFGSNP <sub>n</sub> LTK                                              | P22792         | 1049.5262  |
| 58                                                 | GHTLTL <sub>n</sub> FTR                                              | A0A024RDY3     | 1160.60585 |
| Glycopeptides detected only in breast cancer serum |                                                                      |                |            |

|    |                                                                                                                  |                |            |
|----|------------------------------------------------------------------------------------------------------------------|----------------|------------|
| 1  | NEEY <sub>n</sub> KSVQEIQATFFYFTP <sub>n</sub> KTED<br>TIFLR                                                     | P02763; P19652 | 3674.7537  |
| 2  | FQSPAGTEALFELH <sub>n</sub> ISVADSA <sub>n</sub> YS<br>CVYVDLKPPFGGSAPSER                                        | P04217         | 4630.17186 |
| 3  | YPHKPEI <sub>n</sub> STTHPGADLQ <sub>n</sub> FCR                                                                 | P00734         | 2712.24709 |
| 4  | CSDGWSFDATTLDD <sub>n</sub> GTMLFFK                                                                              | P02790         | 2529.05847 |
| 5  | LTPLCVTL <sub>n</sub> CTTY <sub>n</sub> RTNGG <sub>n</sub> TTVEP<br>TMKEEVK <sub>n</sub> CSF <sub>n</sub> ATTELK | L7WIR7         | 4908.31584 |
| 6  | TNV <sub>n</sub> VTSI <sub>n</sub> NTIMGEMK <sub>n</sub> CSF <sub>n</sub> TTT<br>EIR                             | A0A1W6IAN5     | 3191.46534 |
| 7  | SLTF <sub>n</sub> ETYQDISELVYGAK                                                                                 | P01008         | 2179.04412 |
| 8  | HGIQYFN <sub>n</sub> NTQHSSLFTLNEVK                                                                              | B4E1C2         | 2593.23176 |
| 9  | RTNW <sub>n</sub> VTFDNAAGGDLEVTTHSF<br>NCR                                                                      | Q5IL01         | 2985.30679 |
| 10 | CG <sub>n</sub> CSLTTLKDEDFCK                                                                                    | P49908         | 1948.80853 |
| 11 | GL <sub>n</sub> LTEDTYKPR                                                                                        | B4DVE1         | 1407.71144 |
| 12 | DQYVEPE <sub>n</sub> VTIQCDSGYGVVGPQS<br>ITCSGNR                                                                 | P04003         | 3430.51619 |
| 13 | DCDPPGNPVHGYFEGN <sub>n</sub> FTLGSTIS<br>YYCEDR                                                                 | P20851         | 3583.4689  |
| 14 | GLEWVSSI <sub>n</sub> GSNGR                                                                                      | A0A5C2GE75     | 1476.70775 |
| 15 | QDQCIY <sub>n</sub> TTYLNVQR                                                                                     | P02763         | 1916.8807  |
| 16 | CGLVPVLAENY <sub>n</sub> KSDNCEDT                                                                                | B4E1B2; P02787 | 1477.73554 |
| 17 | FSGSGSDT <sub>n</sub> FTLTISR                                                                                    | A0A5C2GWP7     | 1690.79187 |
| 18 | FQLL <sub>n</sub> FSSSELK                                                                                        | X5D8W0         | 1413.72602 |
| 19 | GRF <sub>n</sub> ISR                                                                                             | A0A7S5C2E9     | 850.45298  |
| 20 | CI <sub>n</sub> QSICEK                                                                                           | B4DZ36         | 1152.50237 |
| 21 | VELEDFNG <sub>n</sub> RTFAHY                                                                                     | Q6UY50         | 1194.52732 |

|    |                                                |            |            |
|----|------------------------------------------------|------------|------------|
| 22 | FGYILHTDnRRCRVE                                | P48740     | 1236.60076 |
| 23 | WEYCnLTR                                       | A0A8J8ZCA0 | 1142.49352 |
| 24 | FTDSEnVCQER                                    | P43652     | 1385.56378 |
| 25 | TLFCnASK                                       | P20851     | 941.43969  |
| 26 | GLINCLSnITGILLTRDGGPSnDSnK<br>TnKTEVFRPGGGDMR  | T1RLZ8     | 4378.14019 |
| 27 | ESVTDHVNLIPTLEKPLQnFTLCFR                      | P02743     | 2973.50263 |
| 28 | SQQKTQQAEAAGGKVSQNYPIVQ<br>NLQGQMVHQnLSPR      | C3VAH6     | 4081.99959 |
| 29 | LGTSLSGHVLMnGTLK                               | P80108     | 1715.89965 |
| 30 | KYQEKDInASEnGSVMDEANLESL<br>NK                 | Q9Y6L6     | 2927.35749 |
| 31 | DVDKEFYLFPTVFDEnESLLEDNI<br>R                  | A5PL27     | 3161.52012 |
| 32 | LTPLCVTLnCTNATASnATASnSSII<br>EGMKnCSFnITTELDR | M4M317     | 4747.24301 |
| 33 | GGNSNGALCHFPFLYNNHnYTDC<br>TSEGR               | A0A024R462 | 3204.31704 |
| 34 | DGGKGnKTNnNTETFRPGGGNMK<br>DNWR                | E7DV11     | 2983.33473 |
| 35 | GLEWIGEIYHSGSINYnPSLK                          | A0A7S5BXW1 | 2379.15032 |
| 36 | ELPGVCnETMMALWEECKPCLK                         | A0A384NKS6 | 2696.1897  |
| 37 | EnLTAPGSDSAVFFEQGTTR                           | A5PL27     | 2127.98292 |
| 38 | HGIQYFNnNTQHSSLFMLNEVK                         | B4DPP8     | 2622.24055 |
| 39 | YnWSFIHCPACQCNGHSK                             | B4DZ36     | 2267.90555 |
| 40 | FSGSGGTDFTLnISR                                | A0A5C2GL91 | 1646.76566 |
| 41 | nASVPNLRGSEK                                   | B3KPT5     | 1273.63827 |
| 42 | KESGWSGYPHTQEnVSK                              | Q8ND71     | 1934.8879  |

|    |               |        |           |
|----|---------------|--------|-----------|
| 43 | ISnFTNKNMKEVK | H0YNF7 | 1553.7992 |
|----|---------------|--------|-----------|

**Table S5** Details of enriched phosphopeptides derived from serum of the breast cancer patients and healthy people by hydrazide-POPs-Ti<sup>4+</sup> composites. s, t, y: Phosphorylation site.

| Number                                                                                        | Amino acid Sequence    | Protein Group<br>Accessions | MH+[Da]    |
|-----------------------------------------------------------------------------------------------|------------------------|-----------------------------|------------|
| Phosphopeptides were detected in the serum of both normal subjects and breast cancer patients |                        |                             |            |
| 1                                                                                             | VREsDEETQIK            | C0JYY2                      | 1413.62573 |
| 2                                                                                             | VTEPISAEsGEQVER        | U5LGW0                      | 1710.7582  |
| 3                                                                                             | TCVADEsAENC DK         | P02768                      | 1578.54478 |
| 4                                                                                             | ETTCSKEsNEELTESCETKK   | B4E1C2                      | 2469.99971 |
| 5                                                                                             | ETTCSKEsNEELTESCETK    | B4E1C2                      | 2341.90474 |
| 6                                                                                             | CDSSPDsAEDVR           | P02765                      | 1417.49373 |
| 7                                                                                             | CDSSPDsAEDVRK          | P02765                      | 1545.58869 |
| 8                                                                                             | EsNEELTESCETK          | B4E1C2                      | 1635.60915 |
| 9                                                                                             | sKEQLTPLIK             | V9GYM3                      | 1236.65993 |
| 10                                                                                            | DIHVTQsPSSVSASVGDR     | A0A5C2GH73                  | 1921.86513 |
| 11                                                                                            | AFYTGEIIGDIRQAHCNLsRtK | B2YR04                      | 2710.22083 |
| Phosphopeptides detected only in normal serum                                                 |                        |                             |            |
| 1                                                                                             | MADEAGsEADHEGTHSTK     | P02671                      | 1952.73279 |
| 2                                                                                             | NPSSAGsWNSGSSGPGSTGNR  | P02671                      | 2043.81521 |
| 3                                                                                             | HRHPDEAAFFDTAsTGK      | P02671                      | 1966.84433 |
| 4                                                                                             | GSESGIFtNTK            | P02671                      | 1220.51947 |

|                                                      |                                                 |            |            |
|------------------------------------------------------|-------------------------------------------------|------------|------------|
| 5                                                    | LPFLAHALyVQAPTVTIEGFLQALS<br>LAVDK              | Q15645     | 3305.75853 |
| 6                                                    | VIPMtQSPSSLSASVGDR                              | A0A5C2FVT6 | 1953.89873 |
| 7                                                    | QAHCsIDER                                       | A0A1L7E2S8 | 1195.45616 |
| 8                                                    | tDIFVTSFGPVSDHDMEYTIDVF                         | E5RJS3     | 2875.08985 |
| 9                                                    | AGAADsAPYPGGGGNGASGGGSG<br>GSK                  | A0A8V8TM73 | 2143.86764 |
| 10                                                   | FSHsACYDDANQSMYVFGGCTQS<br>SCNAAFNDLWRLDLNSK    | Q6P3S6     | 4924.90032 |
| 11                                                   | MNNMSFAVPMGsRPCALGLFCCC<br>SSCFCLCCPR           | O36595     | 4199.52446 |
| 12                                                   | tEGNSTLILPCR                                    | A0A7T3QXW6 | 1440.65526 |
| 13                                                   | DDtEQGGGGAGGGNNSGSGAEEN<br>SNAAAAAMQPVEDMNDYAIR | A0A7D6TSN7 | 4267.66843 |
| 14                                                   | sVLIGEFLEK                                      | Q05DQ2     | 1214.60683 |
| 15                                                   | GHEtEMHNIWATHACVPTDPNPQE<br>ILMENVTENFNMWK      | A0A0H4LWX2 | 4776.90943 |
| Phosphopeptides detected only in breast cancer serum |                                                 |            |            |
| 1                                                    | LPTDsELAPR                                      | P49908     | 1178.5453  |
| 2                                                    | KQLGAGsIEECAAK                                  | B2R7F8     | 1541.70293 |



|    |                                              |                           |            |
|----|----------------------------------------------|---------------------------|------------|
| 3  | KyFIDFVARETTCSKESNEELTESC<br>ETK             | B4E1C2                    | 3561.48384 |
| 4  | KATEDEG <sub>s</sub> EQKIPEATNR              | A0A3S8NFS6                | 2082.93393 |
| 5  | HTFMGVVSLGSP <sub>s</sub> GEVSHPR            | P02765                    | 2160.98961 |
| 6  | LGAGtQVIVELGAYVQAESISK                       | Q6WB99                    | 2313.17377 |
| 7  | VHtECCHGDLLECADDR                            | B4DPR2; F6KPG5;<br>A8K9P0 | 2166.80386 |
| 8  | YKVDYESQSTDTQNF <sub>s</sub> SESK            | A6XND1                    | 2422.99224 |
| 9  | VTTVAsHTSDSDVPSGVTEVVVK                      | A0A384NKS6                | 2394.14359 |
| 10 | VTYT <sub>s</sub> QEDLVEK                    | P05156                    | 1491.66145 |
| 11 | QLGAG <sub>s</sub> IEECAAK                   | B2R7F8                    | 1413.60797 |
| 12 | QVEKEEtNEIQVVNEEPQR                          | Q8NBJ4                    | 2378.08714 |
| 13 | SHCIAEVENDEMPADLP <sub>s</sub> LAADFV<br>ESK | A8K9P0                    | 3070.30572 |
| 14 | SHCIAEVENDGMPADLP <sub>s</sub> LAADFV<br>ESK | B4DPR2                    | 2982.28968 |
| 15 | SKDHEELSLVAsEAVR                             | Q96IY4                    | 1849.86915 |
| 16 | DMPAsEDLQDLQK                                | P49908                    | 1569.65023 |
| 17 | DIPTN <sub>s</sub> PELEETLTHITIK             | B4E1C2                    | 2219.0479  |
| 18 | ATEDEG <sub>s</sub> EQKIPEATNR               | A0A3S8NFS6                | 1954.83897 |
| 19 | AEQCCEETAsSISLHGK                            | A0A024R035                | 1986.79328 |

|    |                                            |                |            |
|----|--------------------------------------------|----------------|------------|
| 20 | AFQYHsKEQQCVIMAENR                         | B2R7F8         | 2319.00461 |
| 21 | ENtVTNDWIPEGEEDDDYLDLEK                    | P05546         | 2819.1455  |
| 22 | VQsTELCAGHLAGGTDSCQGDSG<br>GPLVCFEK        | B2R7F8         | 3317.39087 |
| 23 | IQMTQSPsSLSASVGDR                          | A0A5C2FW50     | 1939.78681 |
| 24 | sEETKENEGFTVTAEGK                          | P01024         | 1935.82192 |
| 25 | KDsGEDPATCAFQR                             | Q13103         | 1661.66253 |
| 26 | VIQMTQSPSsLSASVGDR                         | A0A5C2GB04     | 1958.8889  |
| 27 | GEVQAMLGQsTEELR                            | H0Y7L5         | 1727.76699 |
| 28 | tSESGELHGLTTEEEFVEGIYK                     | A0A087WT59     | 2535.11744 |
| 29 | YKVVRIEPLGIAPtQASRR                        | M4XZV0         | 2314.18324 |
| 30 | ISAsAEELR                                  | Q13784; P06727 | 1055.47688 |
| 31 | THLAPYsDELR                                | P02647         | 1381.61477 |
| 32 | SAGsVESPSVSSTHR                            | A6XND1         | 1567.67481 |
| 33 | EALLDTGADDtIFKDINLPGR                      | A0A0S2L3P3     | 2354.12755 |
| 34 | LDVQPINGsNTSYMLINCNTSVITQ<br>ACPK          | O57038         | 3318.52043 |
| 35 | sPEVIPMFSALSEGATPTDLNTMLN<br>TVGGHQAAMQMLK | B5TAH0         | 4083.89354 |
| 36 | LLSLGAGEFKsQEHAk                           | P12259         | 1794.87859 |
| 37 | EVQLAVsGGGLVQPGGSLR                        | A0A5C2GEV4     | 1903.96372 |

|    |                                |            |            |
|----|--------------------------------|------------|------------|
| 38 | FSVVYAKCDSSPDsAEDVR            | P02765     | 2211.92641 |
| 39 | NIQMtQSPSSLSASVGDR             | A0A5C2GHK5 | 1973.86341 |
| 40 | VDNALQSGNSQESVtEQDSK           | P0DOX7     | 2215.93506 |
| 41 | TNTNVNCPIECFMPLDVQADREDS<br>RE | A0A024R462 | 3190.32754 |
| 42 | SIEELARKNLLLEPsLEAK            | B3KW95     | 2313.15027 |
| 43 | DIQMIQSPsSLSASVGDR             | A0A5C2GG67 | 1970.8889  |
| 44 | AIQLTQsPSSRSASVGDR             | A0A5C2FYB2 | 1981.93387 |
| 45 | AIQMTQSPStLSASVGDR             | A0A5C2GC00 | 1970.8889  |
| 46 | sCESNSFPVHPGTAECCTK            | D6RF35     | 2344.90324 |
| 47 | VEtGVGGPQVSGESPVVLGSGTK        | A0A6C1AA22 | 2221.07478 |
| 48 | MDFSSNGKYLAtCADDR              | A0A087WXC6 | 2046.79328 |
| 49 | AFyASEIIGDIRQAHCYLSAEK         | Q9YU01     | 2702.17215 |

## Reference

- 1 L.H. Yi, Y.H. Yan, K.Q. Tang, C.F. Ding, Facile preparation of polymer-grafted ZIF-8-modified magnetic nanospheres for effective identification and capture of phosphorylated and glycosylated peptides, *Anal. Methods*, 2020, **12**, 4657-4664, DOI: 10.1039/d0ay01412e.
- 2 Y.L. Wu, Q.J. Liu, Y.Q. Xie, C.H. Deng, Core-shell structured magnetic metal-organic framework composites for highly selective enrichment of endogenous N-linked glycopeptides and phosphopeptides, *Talanta*, 2018, **190**, 298-312, DOI: 10.1016/j.talanta.2018.08.010.
- 3 H. Qi, Z. Li, J.T. Ma, Q. Jia, Tailoring a multifunctional magnetic cationic metal-organic framework composite for synchronous enrichment of phosphopeptides/glycopeptides, *J. Mater. Chem. B*, 2022, **10**, 3560-3566, DOI: 10.1039/d2tb00057a.
- 4 Y.L. Wu, Q.J. Liu, C.H. Deng, L-cysteine-modified metal-organic frameworks as multifunctional probes for efficient identification of N-linked glycopeptides and phosphopeptides in human crystalline lens, *Anal. Chim. Acta*, 2019, **1061**, 110-121, DOI: 10.1016/j.aca.2019.01.052.
- 5 Y.T. He, Q. Zheng, H. Huang, Y. Ji, Z. Lin, synergistic synthesis of hydrophilic hollow zirconium organic frameworks for simultaneous recognition and capture of phosphorylated and glycosylated peptides, *Anal. Chim. Acta*, 2022, **1198**, 339552, DOI: 10.1016/j.aca.2022.339552.
